# Supplementary material for: Impact of Right Ventricular Pressure Load After Repair of Tetralogy of Fallot
Source: PubMed Central journal article supplement — J Am Heart Assoc. 2022 Mar 18;11(7):e022694. doi: 10.1161/JAHA.121.022694 (PMC9075442; doi:10.1161/jaha.121.022694), 2022-03-18
Supplement: JAH3-11-e022694-s001.pdf [file JAH3-11-e022694-s001.pdf]

## **SUPPLEMENTAL MATERIAL**

## Appendix. The German Competence Network for Congenital Heart Defects Investigators

Gunter Kerst, Majed Kanaan, Klinik für Kinderkardiologie; Corinna Lebherz, Klinik für Kardiologie, André Rüffer, Herzchirurgie für Kinder und Erwachsene mit angeborenen Herzfehlern, Universitätsklinikum Aachen; Aachen.

Dimitrios Gkalpakiotis, Praxis für Kinderkardiologie; Aachen.

Andrea Schedifka, Praxis für Kinder- und Jugendmedizin, Kinderkardiologie; Ahrensfelde.

Gernot Buheitel, Joachim Streble, II. Klinik für Kinder und Jugendliche, Universitätsklinikum Augsburg; Augsburg.

Rainer Willing, Klinik für Kinder- und Jugendmedizin, Kinderkardiologie, Ubbo-Emmius-Klinik; Aurich.

Stephan Schubert, Kai Thorsten Laser, Karl-Otto Dubowy Kinderherzzentrum/Zentrum für angeborene Herzfehler, Klinik für Kinderkardiologie und angeborene Herzfehler; Eugen Sandica, Kinderherzzentrum/Zentrum für angeborene Herzfehler, Klinik für Kinderherzchirurgie und angeborene Herzfehler, Herz- und Diabeteszentrum NRW; Bad Oeynhausen.

Burkhard Trusen, Praxis Kinder- und Jugendmedizin, Kinderkardiologie; Bamberg.

Felix Berger, Oliver Miera, Stanislav Ovroutski, Katharina Schmitt, Klinik für angeborene Herzfehler und Kinderkardiologie; Joachim Photiadis, Klinik für die Chirurgie Angeborener Herzfehler/Kinderherzchirurgie, Deutsches Herzzentrum Berlin; Berlin.

Felix Berger, Bernd Opgen-Rhein, Katja Weiss, Sabine Klaassen, Klinik für Pädiatrie mit Schwerpunkt Kardiologie, Charité - Universitätsmedizin Berlin, Campus Virchow-Klinikum; Berlin.

Christoph Berns, Praxis für Kinderheilkunde, Jugendmedizin und Kinderkardiologie; Berlin.

Thomas Boeckel, Guido Haverkämper, Praxis für Kinder- und Jugendmedizin, Kinderkardiologie; Berlin.

Andreas Kästner, Heike Koch, Björn Peters, Gemeinschaftspraxis für Pädiatrische Kardiologie; Berlin.

Florian Schmidt, Praxis für Kinder- und Jugendmedizin, Kinderkardiologie; Berlin.

Jens Timme, Konstanze Engel, Birgit Franzbach, Gabriela Senft, Facharztpraxis für Kinderkardiologie und Erwachsene mit angeborenem Herzfehler; Berlin.

Frank Beyer, Praxis für Kinder- und Jugendmedizin, Kinderkardiologie; Bielefeld.

Klaus Winter, Klinik für Kinder- und Jugendmedizin, St.-Agnes-Hospital; Bocholt.

Johannes Breuer, Martin Schneider, Zentrum für Kinderheilkunde, Abteilung für Kinderkardiologie; Boulos Asfour, Klinik und Poliklinik für Herzchirurgie, Universitätsklinikum Bonn; Bonn.

Jens Bahlmann, Eberhard Griese, Kinderkardiologische Gemeinschaftspraxis; Braunschweig.

Trong Phi Lê, Klinik für strukturelle und angeborene Herzfehler/ Kinderkardiologie, Klinikum Links der Weser; Bremen.

Joachim Hebe, Jan-Hendrik Nürnberg, Elektrophysiologie Bremen, Zentrum Bremen am Klinikum Links der Weser; Bremen.

Annette Magsaam, Praxis für Kinderkardiologie und Angeborene Herzfehler; Bremen.

Ronald Müller, Praxis für Angeborene Herzfehler/ Kinderkardiologie; Bremen.

Ludger Potthoff, Praxis Celler Centrum für Kinder- und Jugendmedizin, Kinderkardiologie; Celle.

Renate Voigt, Praxis für Kinder- und Jugendmedizin, Kinderkardiologie; Chemnitz.

Tim Krüger, Kinderarzt-Praxis Ilmenau/Coburg, Praxis für Kinder- und Jugendmedizin, Kinderkardiologie; Coburg.

Hubert Gerleve, Ulrich Kleideiter, Kinder- und Jugendklinik, Christophorus-Kliniken Coesfeld; Coesfeld.

Dirk Schneider-Kulla, Klinik für Pädiatrie/Kinder- und Jugendheilkunde, Kinderkardiologie; Jürgen Krülls-Münch, I. Medizinische Klinik, Klinik für Kardiologie, Angiologie und internistische Intensivtherapie, Carl-Thiem-Klinikum Cottbus; Cottbus.

Thomas Menke, Kinderkardiologie, Vestische Kinder- und Jugendklinik Datteln; Datteln.

Martin Lehn, Praxis für Kinder- und Jugendkardiologie und für Erwachsene mit angeborenen Herzfehlbildungen; Dortmund.

Antje Heilmann, Helge Tomczak, Praxis für Kinderkardiologie, Kinderzentrum Dresden-Friedrichstadt; Dresden.

Gleb Tarusinov, Klinik für Kinderkardiologie - Angeborene Herzfehler; Michael Scheid, Kinderherzchirurgie und Chirurgie für angeborene Herzfehler, Herzzentrum Duisburg; Duisburg.

Ertan Mayatepek, Frank Pillekamp, Klinik für Allgemeine Pädiatrie, Neonatologie und Kinderkardiologie; Artur Lichtenberg, Klinik für Kardiovaskuläre Chirurgie, Universitätsklinikum Düsseldorf; Düsseldorf.

Christiane Terpeluk, Praxis für Kinder- und Jugendmedizin, Kinderkardiologie; Ehingen.

Bruno Kolterer, Kinderkardiologische Schwerpunktpraxis; Erfurt.

Sven Dittrich, Kinderkardiologische Abteilung; Ulrike Gundlach, Medizinische Klinik 2 - Kardiologie und Angiologie; Robert Cesnjevar, Kinderherzchirurgische Abteilung, Universitätsklinikum Erlangen, Friedrich-Alexander-Universität Erlangen-Nürnberg; Erlangen.

Carsten Müntjes, Klinik für Kinderheilkunde III, Abteilung für Pädiatrische Kardiologie Universitätsklinikum Essen; Essen.

Geert Morf, Praxis für Kinder- und Jugendmedizin und EMAH, Kinderkardiologie; Flensburg.

Anoosh Esmaeili, Klinik für Kinder- und Jugendmedizin, Kinderkardiologie, Universitätsklinikum Frankfurt; Frankfurt.

Stephan Backhoff, Praxis für Kinderkardiologie/angeborene Herzerkrankungen; Frankfurt.

Brigitte Stiller, Zentrum für Kinder- und Jugendmedizin, Klinik für Angeborene Herzfehler/ Pädiatrische Kardiologie; Friedhelm Beyersdorf, Klinik für Herz- und Gefäßchirurgie; Johannes Kroll, Klinik für Herz- und Gefäßchirurgie, Sektion Kinderherzchirurgie, Universitäts-Herzzentrum Freiburg Bad Krozingen; Freiburg.

Nicole Häffner, Praxis für Kinder- und Jugendmedizin, Kinderkardiologie; Freiburg.

Jannos Siaplaouras, Praxis für Kinder- und Jugendmedizin, Kinderkardiologie, Erwachsene mit angeborenem Herzfehler, Bluttransfusionswesen am Herz-Jesu-Krankenhaus; Fulda.

Antje Masri-Zada, Praxis für Kardiologie; Gera.

Christian Jux, Klinik für Kinderkardiologie und angeborene Herzfehler; Andreas Böning, Hakan Akintürk, Klinik für Herz-, Kinderherz- und Gefäßchirurgie, Universitätsklinikum Gießen und Marburg; Gießen.

Thomas Paul, Matthias Sigler, Klinik für Pädiatrische Kardiologie und Intensivmedizin mit Neonatologie und Pädiatrischer Pneumologie; Theodor Tirilomis, Klinik für Thorax-, Herz- und Gefäßchirurgie – Schwerpunkt Kinderherzchirurgie, Universitätsklinikum Göttingen; Göttingen.

Gabriele Schürer, Praxis für Kinder- und Jugendmedizin, Kinderkardiologie; Greiz.

Johannes Hartmann, Schwerpunktpraxis für Kinder- und Jugendkardiologie; Hagen.

Ralph Grabitz, Uta Liebaug, Universitätsklinik und Poliklinik für Pädiatrische Kardiologie, Universitätsklinikum Halle (Saale); Halle.

Claudius Rotzsch, Kinderkardiologische Praxis; Halle.

Rainer Kozlik-Feldmann, Carsten Rickers, Thomas Mir, Michael Hübler, Jörg Sachweh, Kinderkardiologie/ Herzchirurgie für angeborene Herzfehler, Universitäres Herz- und Gefäßzentrum UKE Hamburg; Hamburg.

Stefan Renz, Andreas Schemm, Praxis für Kinder- und Jugendmedizin, Kinderkardiologie und EMAH; Hamburg.

Bernd Friedrich, Otmar Schlobohm, Kinder- und Jugendarztpraxis, Kinderkardiologie; Hamburg.

Dietmar Böthig, Burkhard Wermter, Andrea Kelter-Klöpping, Klinik für Pädiatrische Kardiologie und Intensivmedizin; Alexander Horke, Chirurgie angeborener Herzfehler; Johann Bauersachs, Mechthild Westhoff-Bleck, Klinik für Kardiologie und Angiologie, Medizinische Hochschule Hannover; Hannover.

Matthias Gorenflo, Zentrum für Kinder- und Jugendmedizin Pädiatrische Kardiologie/Angeborene Herzfehler, Matthias Karck, Tsvetomir Loukanov, Klinik für Herzchirurgie, Universitätsklinikum Heidelberg; Heidelberg.

Hermann Schrüfer, Praxis für Kinder- und Jugendmedizin, Kinderkardiologie; Hettstadt.

Martin Wilken, Kinderarzt-Praxis Hof/Nail; Praxis für Kinder- und Jugendmedizin, Kinderkardiologie; Hof.

Hashim Abdul-Khaliq, Tanja Rädle-Hurst, Axel Rentzsch, Klinik für Pädiatrische Kardiologie; Hans-Joachim Schäfers, Klinik für Thorax- und Herz-Gefäß-Chirurgie, Universitätsklinikum des Saarlandes; Homburg.

Hagen Reichert, Praxis für Kinder- und Jugendmedizin, Kinderkardiologie; Reisemedizin, Gelbfieberimpfstelle; Homburg.

Daniel Vilser, Klinik für Kinder- und Jugendmedizin, Sektion Kardiologie, Universitätsklinikum Jena; Jena.

Thomas Kriebel, Klinik für Kinder- und Jugendmedizin, Kinderkardiologie, Westpfalz-Klinikum; Kaiserslautern.

Arnulf Boysen, Schwerpunktpraxis für angeborene Herzfehler; Karlsruhe.

Anselm Uebing, Inga Voges, Klinik für angeborene Herzfehler und Kinderkardiologie; Tim Attmann, Joachim Thomas Cremer, Jens Scheewe, Klinik für Herz- und Gefäßchirurgie, Universitätsklinikum Schleswig-Holstein; Kiel.

Regina Buchholz-Berdau, Peter Möller, Gemeinschaftspraxis der Kinder- und Jugendärzte und Kinderkardiologen; Kiel.

Thorsten Horter, Schwerpunktpraxis für Kinder- und Jugendkardiologie; Kiel.

Konrad Brockmeier, Klinik und Poliklinik für Kinderkardiologie, Gerardus B. W. E. Bennink, Klinik für Herz- und Thoraxchirurgie, Schwerpunkt Kinderherzchirurgie, Stephan Baldus, Klinik III für Innere Medizin, Herzzentrum Universitätsklinikum Köln; Köln.

Alex Gillor, Praxis für Kinder- und Jugendkardiologie; Köln.

Tim Niehues, Wolfgang Lawrenz, Zentrum für Kinder- und Jugendmedizin, Kinderkardiologie, HELIOS Klinikum Krefeld; Krefeld.

Steffen Leidig, Praxis für Kinder- und Jugendmedizin, Kinderkardiologie; Lauf.

Ingo Dähnert, Frank-Thomas Riede, Universitätsklinik für Kinderkardiologie; Martin Kostelka, Universitätsklinik für Herzchirurgie, Kinderherzchirurgie, Herzzentrum Leipzig; Leipzig.

Liane Kändler, Medizinisches Versorgungszentrum Jessen, Außenstelle Wittenberg und Klinik für Kinder- und Jugendmedizin, Paul Gerhardt Diakonie und Pflege GmbH; Lutherstadt Wittenberg.

Martin Bethge, Stefan Köster, Praxis für Kinder- und Jugendmedizin, Kinderkardiologie und EMAH; Lübeck.

Christoph Schröder, Praxis für Kinderkardiologie, Kinderpneumologie, Erwachsene mit angeborenen Herzfehlern; Lüneburg.

Jens Karstedt, Kardiologische Schwerpunktpaxis für Kinder und Jugendliche am Klinikum Magdeburg; Magdeburg.

Uwe Seitz, Praxis für Kinder- Jugendmedizin, Kinderkardiologie; Maintal.

Christoph Kampmann, Zentrum für Kinder- und Jugendmedizin, Abteilung für Kinderkardiologie, Daniel-Sebastian Dohle, Klinik und Poliklinik für Herz-, Thorax- und Gefäßchirurgie, Universitätsmedizin der Johannes Gutenberg-Universität Mainz; Mainz.



Frank Stahl, Praxis für Kinder- und Jugendkardiologie, arterielle Hypertonie bei Kindern und Jugendlichen, Erwachsene mit angeborenen Herzfehlern; Mannheim.

Mojtaba Abedini, Praxis für Kinder- und Jugendkardiologie am Universitätsklinikum Gießen und Marburg; Marburg.

Joachim Müller-Scholden, Praxis für Kinder- und Jugendmedizin, Kinderkardiologie; Marktheidenfeld.

Peter Ewert, Alfred Hager, Michael Huntgeburth, Harald Kaemmerer, Nicole Nagdyman, Jörg Schoetzau, Oktay Tutarel, Klinik für Kinderkardiologie und Angeborene Herzfehler; Rüdiger Lange, Klinik für Herz- und Gefäßchirurgie; Jürgen Hörer, Klinik für Chirurgie angeborener Herzfehler und Kinderherzchirurgie Deutsches Herzzentrum München; München.

Nikolaus A. Haas, Abteilung Kinderkardiologie und Pädiatrische Intensivmedizin; Jürgen Hörer, Herzchirurgische Klinik und Poliklinik, Sektion Kinderherzchirurgie; Klinikum der Ludwig-Maximilians-Universität, Campus Großhadern; München.

Michael Hauser, Praxis für Kinder- und Jugendkardiologie und Erwachsene mit angeborenen Herzfehlern; München.

Alexander Roithmaier, Praxis für Kinder- und Jugendmedizin, Schwerpunktpraxis für Kinder- und Jugendkardiologie; München.

Hans-Gerd Kehl, Astrid Lammers, Klinik für Kinder- und Jugendmedizin - Pädiatrische Kardiologie, Edward Malec, Department für Herz- und Thoraxchirurgie, Abteilung Kinderherzchirurgie; Helmut Baumgartner, Gerhard Diller, Klinik und Poliklinik für Erwachsene mit angeborenen (EMAH) und erworbenen Herzfehlern, Universitätsklinikum Münster; Münster.

Roswitha Bahle, Praxis für Kinder- und Jugendmedizin, Kinderkardiologie; Neubrandenburg.

Gerald Hofner, Praxis für Kinder- und Jugendmedizin, Kinderkardiologie; Neudrossenfeld.

Stefan Zink, Praxis für Kinder- und Jugendmedizin, Kinderkardiologie; Nürnberg.

Roland Reif, Helmut Singer; Gemeinschaftspraxis für Kinder- und Jugendmedizin, Kinderkardiologie, Allergologie, Asthmatraining, Psychotherapie; Nürnberg.

Christoph Parlasca, Klinik für Kinder- und Jugendmedizin, Evangelisches Krankenhaus Oberhausen; Oberhausen.

Matthias W. Freund, Michael Schumacher, Universitätsklinik für Kinder- und Jugendmedizin, Klinik für Neonatologie, Intensivmedizin und Kinderkardiologie, Klinikum Oldenburg - Elisabeth-Kinderkrankenhaus; Oldenburg.

Oliver Dewald, Universitätsklinik für Herzchirurgie, Klinikum Oldenburg; Oldenburg.

Christine Darrelmann, Gemeinschaftspraxis für Kinder- und Jugendmedizin, Kinderkardiologie; Oldenburg.

Olaf Willmann, Praxis für Kinder- und Jugendmedizin, Kinderkardiologie; Osnabrück.

Norbert Schmiedl, Praxis für Kinderkardiologie; Passau.

Peter Quick, Praxis für Kinder- und Jugendmedizin, Kinderkardiologie; Plauen.

Dirk Hillebrand, Praxis für Kinder- und Jugendmedizin, Schwerpunktpraxis Kinderkardiologie, Angeborene Herzfehler; Pinneberg.

Stephan Michele Eiselt, Praxis für Kinder- und Jugendmedizin, Kinderkardiologie und EMAH; Reinbek.

Torsten Nekarda, Klinik für Kinder- und Jugendmedizin, Agaplesion Diakonieklinikum Rotenburg; Rotenburg.

Michael Eberhard, Praxis für Kinder- und Jugendmedizin, Kinderkardiologie; Rottweil.

Georg Baier, Praxis für Kinder- und Jugendmedizin, Kinderkardiologie; Schwabach.

Frank Uhlemann, Zentrum für angeborene Herzfehler, Olgahospital; Stuttgart.

Ioannis Tzanavaros, Chirurgie für angeborene Herzfehler/Kinderherzchirurgie, Sana Herzchirurgie Stuttgart; Stuttgart.

Alexander Beyer, Gudrun Binz, Steffen Hess, Thomas Teufel, Kinderkardiologische Praxis Stuttgart/EMAH-Schwerpunktpraxis; Stuttgart.

Ronald-Peter Handke, Praxis für Kinder- und Jugendmedizin, Kinderkardiologie; Trier.

Michael Hofbeck, Renate Kaulitz, Ludger Sieverding, Kinderheilkunde II - Kinderkardiologie, Intensivmedizin und Pulmologie; Christian Schlensak, Thorax-, Herz- und Gefäßchirurgie, Migdat Mustafi, Sektion Chirurgie angeborener Herzfehler – Kinderherzchirurgie, Universitätsklinikum Tübingen; Tübingen.

Christian Apitz, Michael Kaestner, Klinik für Kinder- und Jugendmedizin, Sektion Pädiatrische Kardiologie, Universitätsklinikum Ulm; Ulm.

Jürgen Holtvogt, Klinik für Kinder- und Jugendmedizin, Kinderkardiologie, St. Marienhospital Vechta; Vechta.

Carl-Friedrich Wippermann, Praxis für Kinder- und Jugendmedizin, Kinderkardiologie; Walluf.

Sönke Hinz, Praxis für Kinder- und Jugendmedizin, Kinderkardiologie; Weyhe.

Andreas Heusch, Zentrum für Kinder- und Jugendmedizin, Abteilung Kinderkardiologie und -pneumologie, HELIOS Klinikum Wuppertal; Wuppertal.

Johannes Wirbelauer, Kinderklinik, Kinderkardiologie/ EMAH, Universitätsklinikum Würzburg; Würzburg.

Wolfgang Brosi, Praxis für Kinder- und Jugendmedizin, Kinderkardiologie und –pneumologie, Allergologie, Umweltmedizin, Asthma-, Neurodermitis- und Anaphylaxietrainer; Würzburg.

**Table S1. Comparison between the analysis sample for the current study and those patients that were excluded from the original data set**

| <b>Parameter</b>                            | <b>Patients included<br/>N=296</b> | <b>Patients excluded<br/>N=111</b> | <b>p value</b> |
|---------------------------------------------|------------------------------------|------------------------------------|----------------|
| <b><u>Demographics</u></b>                  |                                    |                                    |                |
| Diagnosis, n (%)                            |                                    |                                    | <b>0.02</b>    |
| Data available                              | 283 (96)                           | 106 (95)                           |                |
| TOF / pulmonary stenosis                    | 260 (92)                           | 90 (85)                            |                |
| TOF /PA                                     | 23 (8)                             | 16 (15)                            |                |
| Age at CMR (years)                          | 16.0 (7.0-58.0)                    | 16.0 (6.0-53.0)                    | 0.69           |
| Age at corrective surgery (years)           | 1.0 (0.1-28.0)                     | 2.0 (0.1-19.0)                     | 0.05           |
| Type of repair, n (%)                       |                                    |                                    | 0.46           |
| Data available                              | 258 (87)                           | 86 (77)                            |                |
| Without TAP                                 | 143 (55)                           | 46 (52)                            |                |
| TAP                                         | 62 (24)                            | 17 (22)                            |                |
| TAP and pulmonary artery plasty             | 53 (21)                            | 23 (26)                            |                |
| Time from repair (years)                    | 14 (6-48)                          | 14 (4-44)                          | 0.53           |
| Follow-up (years)                           | 10.1 (0.1-12.9)                    | n/a                                | -              |
| PVR during follow-up, n (%)                 | 119/292 (41)                       | n/a                                | -              |
| <b><u>Clinical status and history</u></b>   |                                    |                                    |                |
| Initial palliation, n (%)                   | 67/282 (24)                        | 26/101(26)                         | 0.69           |
| Previous PVR, n (%)                         | 70/296 (24)                        | 24/111 (22)                        | 0.69           |
| NYHA>class I, n (%)                         | 96/296 (32)                        | 52/109 (48)                        | <b>0.007</b>   |
| 12-lead ECG: QRS duration (ms)              | 147 ± 22                           | 141 ± 25                           | <b>0.03</b>    |
| <b><u>Cardiopulmonary exercise test</u></b> |                                    |                                    |                |
| Peak VO <sub>2</sub> at VAT (ml/min/kg)     | 24.3 ± 8.5                         | 23.8 ± 7.4                         | 0.77           |

|                                                 |                  |                  |              |
|-------------------------------------------------|------------------|------------------|--------------|
| Peak VO <sub>2</sub> (ml/min/kg)                | 31.1 ± 8.4       | 31.2 ± 9.2       | 0.85         |
| Peak heart rate (/min)                          | 172 (79-204)     | 171 (50-200)     | 0.42         |
| <b><u>Echocardiography</u></b>                  |                  |                  |              |
| Peak RVOT gradient (mmHg)                       | 16.0 (1.4-83.0)  | 17.3 (2.2-76.2)  | 0.27         |
| Tricuspid valve regurgitation > moderate, n (%) | 22/211 (10)      | 4/50 (8)         | 0.79         |
| <b><u>CMR study</u></b>                         |                  |                  |              |
| RVEDVi (ml/m <sup>2</sup> )                     | 116 (67-242)     | 113 (54-247)     | 0.12         |
| RVESVi (ml/m <sup>2</sup> )                     | 57 (20-186)      | 57 (22-127)      | 0.62         |
| RVSVi (ml/m <sup>2</sup> )                      | 60 ± 16          | 56 ± 18          | <b>0.01</b>  |
| RVEF (%)                                        | 51 ± 9           | 49 ± 10          | 0.21         |
| PR (%)                                          | 27 (0-65)        | 27 (0-85)        | 0.87         |
| RV mass to volume ratio                         | 0.29 (0.08-0.74) | 0.28 (0.11-0.63) | 0.36         |
|                                                 |                  |                  |              |
| LVEDVi (ml/m <sup>2</sup> )                     | 82 (43-195)      | 76 (35-126)      | <b>0.001</b> |
| LVESVi (ml/m <sup>2</sup> )                     | 34 (17-166)      | 32 (15-60)       | 0.22         |
| LVSVi (ml/m <sup>2</sup> )                      | 47 (23-87)       | 43 (21-82)       | <b>0.007</b> |
| LVEF (%)                                        | 58 (15-74)       | 57 (9-71)        | 0.42         |
| LV mass (g/m <sup>2</sup> )                     | 54 (30-127)      | 55 (22-87)       | 0.65         |
| LV mass to volume ratio                         | 0.69 ± 0.18      | 0.76 ± 0.24      | 0.10         |
| <b><u>Feature tracking analysis</u></b>         |                  |                  |              |
| RV-LS (%)                                       | -12.9 ± 4.6      | n/a              | -            |
| RV-CS (%)                                       | -15.2 ± 4.1      | n/a              | -            |
| LV-LS (%)                                       | -13.8 ± 5.0      | n/a              | -            |
| LV-CS (%)                                       | -20.7 ± 4.8      | n/a              | -            |

|                                      |                  |     |   |
|--------------------------------------|------------------|-----|---|
| LV-RS (%)                            | 25.3 ± 8.8       | n/a | - |
| RV EDSR LS (1/s)                     | 0.67 (0.22-3.76) | n/a | - |
| RV EDSR CS (1/s)                     | 0.93 (0.29-2.71) | n/a | - |
| LV EDSR LS (1/s)                     | 1.08 (0.25-4.03) | n/a | - |
| LV EDSR CS (1/s)                     | 1.49 (0.41-2.76) | n/a | - |
| Interventricular Dysynchrony LS (ms) | 44 (0-607)       | n/a | - |
| Interventricular Dysynchrony CS (ms) | 46 (0-159)       | n/a | - |

*CMR*, cardiovascular magnetic resonance; *TOF*, tetralogy of Fallot; *PA*, pulmonary atresia; *TAP*, transannular patch; *n/a*, not applicable; *PVR*, pulmonary valve replacement; *NYHA*, New York Heart Association functional class; *VO<sub>2</sub>*, oxygen uptake; *VAT*, ventilator anaerobic threshold; *RVOT*, right ventricular outflow tract; *RV*, right ventricle; *LV*, left ventricle; *EDV*, end-diastolic volume; *ESV*, end-systolic volume; *SV*, stroke volume; *EF*, ejection fraction; *PR*, pulmonary regurgitation; *LS*, longitudinal strain; *CS*, circumferential strain; *RS*, radial strain; *EDSR*, early diastolic strain rate. Data are displayed as mean with 1 standard deviation or as median and range.

**Table S2.** Univariable Cox proportional-hazard analysis considering the composite endpoint of death and sustained ventricular tachycardia (VT) that occurred in 8 patients (11 patients with non-sustained VT considered as no event). Peak echocardiographic RVOT gradient remained a significant predictor for adverse events (HR 1.04, 95%-CI 1.00-1.07, p=0.046).

| <b>Parameter</b>                                  | <b>HR</b> | <b>95% CI</b> | <b>p-value</b>   |
|---------------------------------------------------|-----------|---------------|------------------|
| Diagnosis (TOF/PA vs. TOF)                        | 2.48      | 0.29-20.9     | 0.41             |
| Age at CMR (years)                                | 1.08      | 1.02-1.13     | <b>0.004</b>     |
| Age at corrective surgery (years)                 | 1.12      | 1.03-1.23     | <b>0.01</b>      |
| Type of repair (TAP vs. no TAP)                   | 1.59      | 0.36-7.09     | 0.55             |
| Time from repair (years)                          | 1.08      | 1.01-1.17     | <b>0.03</b>      |
| Initial palliation (yes/no)                       | 5.77      | 0.96-34.5     | 0.06             |
| Previous PVR (yes/no)                             | 3.35      | 0.84-13.4     | 0.09             |
| PVR during follow-up (yes/no)                     | 1.64      | 0.36-7.38     | 0.52             |
| NYHA class > I (yes/no)                           | 4.35      | 1.02-18.5     | <b>0.05</b>      |
| QRS (ms)                                          | 0.32      | 0.98-1.05     | 0.32             |
| Peak VO <sub>2</sub> at VAT (ml/min/kg)           | 0.93      | 0.83-1.04     | 0.20             |
| Peak VO <sub>2</sub> (ml/min/kg)                  | 0.89      | 0.81-0.96     | <b>0.004</b>     |
| Peak heart rate (/min)                            | 0.97      | 0.95-0.99     | <b>0.002</b>     |
| RVOT gradient (mmHg)                              | 1.04      | 1.00-1.07     | <b>0.046</b>     |
| Tricuspid valve regurgitation > moderate (yes/no) | 0.96      | 0.11-8.30     | 0.96             |
| RVEDVi (ml/m <sup>2</sup> )                       | 1.02      | 1.01-1.04     | <b>0.01</b>      |
| RVESVi (ml/m <sup>2</sup> )                       | 1.04      | 1.02-1.06     | <b>&lt;0.001</b> |
| RVSVi (ml/m <sup>2</sup> )                        | 0.98      | 0.94-1.03     | 0.50             |
| RVEF (%)                                          | 0.91      | 0.86-0.97     | <b>0.004</b>     |
| PR (%)                                            | 0.99      | 0.95-1.04     | 0.79             |
| RV mass (g/m <sup>2</sup> )                       | 1.02      | 0.98-1.06     | 0.37             |
| RV mass to volume ratio                           | 0.72      | 0.01-341.3    | 0.92             |
| LVEDVi (ml/m <sup>2</sup> )                       | 1.05      | 1.03-1.07     | <b>&lt;0.001</b> |
| LVESVi (ml/m <sup>2</sup> )                       | 1.04      | 1.02-1.06     | <b>&lt;0.001</b> |
| LVSVi (ml/m <sup>2</sup> )                        | 1.02      | 0.94-1.10     | 0.65             |
| LVEF (%)                                          | 0.92      | 0.87-0.96     | <b>0.001</b>     |
| LV mass (g/m <sup>2</sup> )                       | 1.03      | 1.00-1.07     | 0.05             |
| LV mass to volume ratio                           | 0.54      | 0.01-42.3     | 0.78             |
| RV-LS (%)                                         | 1.25      | 1.03-1.52     | <b>0.02</b>      |
| RV-CS (%)                                         | 1.15      | 1.18-1.89     | <b>0.001</b>     |
| LV-LS (%)                                         | 1.18      | 1.00-1.39     | 0.05             |
| LV-CS (%)                                         | 1.32      | 1.15-1.52     | <b>&lt;0.001</b> |
| LV-RS (%)                                         | 0.81      | 0.71-0.91     | <b>0.001</b>     |
| RV EDSR LS (1/s)                                  | 1.30      | 0.24-7.13     | 0.77             |
| RV EDSR CS (1/s)                                  | 0.01      | 0.01-0.50     | <b>0.02</b>      |
| LV EDSR LS (1/s)                                  | 0.17      | 0.02-1.42     | 0.10             |
| LV EDSR CS (1/s)                                  | 0.01      | 0.01-0.19     | <b>0.002</b>     |



|                                      |      |           |             |
|--------------------------------------|------|-----------|-------------|
| Interventricular Dysynchrony LS (ms) | 1.01 | 1.00-1.01 | <b>0.03</b> |
| Interventricular Dysynchrony CS (ms) | 1.00 | 0.99-1.01 | 0.61        |

*CMR*, cardiovascular magnetic resonance; *TOF*, tetralogy of Fallot; *PA*, pulmonary atresia; *TAP*, transannular patch; *PVR*, pulmonary valve replacement; *NYHA*, New York Heart Association functional class; *VO<sub>2</sub>*, oxygen uptake; *VAT*, ventilator anaerobic threshold; *RVOT*, right ventricular outflow tract; *RV*, right ventricle; *LV*, left ventricle; *EDV*, end-diastolic volume; *ESV*, end-systolic volume; *SV*, stroke volume; *EF*, ejection fraction; *PR*, pulmonary regurgitation; *LS*, longitudinal strain; *CS*, circumferential strain; *RS*, radial strain; *EDSR*, early diastolic strain rate.

**Table S3.** Differences in freedom from pulmonary valve replacement in the different subgroups according to the peak RVOT gradient (< 15, 15-30 and > 30 mmHg) and the severity of pulmonary regurgitation (PR < 25% and PR ≥ 25%). Statistical comparisons were made using the Log Rank (Mantel-Cox) test.

| Subgroup                | PR < 25%,<br><15 mmHg | PR ≥ 25%,<br><15 mmHg | PR ≥ 25%,<br>15-30 mmHg | PR ≥ 25%,<br>>30 mmHg | PR < 25 %,<br>15-30 mmHg | PR < 25%,<br>>30 mmHg |
|-------------------------|-----------------------|-----------------------|-------------------------|-----------------------|--------------------------|-----------------------|
| PR < 25%,<br>< 15 mmHg  | -                     | <0.001                | <0.001                  | <0.001                | 0.66                     | <0.001                |
| PR ≥ 25%,<br>< 15 mmHg  | <0.001                | -                     | 0.37                    | 0.71                  | <0.001                   | 0.95                  |
| PR ≥ 25%,<br>15-30 mmHg | <0.001                | 0.37                  | -                       | 0.31                  | <b>0.001</b>             | 0.48                  |
| PR ≥ 25%,<br>>30 mmHg   | <0.001                | 0.71                  | 0.31                    | -                     | <0.001                   | 0.68                  |
| PR < 25%,<br>15-30 mmHg | 0.66                  | <0.001                | <b>0.001</b>            | <0.001                | -                        | <0.001                |
| PR < 25%,<br>>30 mmHg   | <0.001                | 0.95                  | 0.48                    | 0.68                  | <0.001                   | -                     |

**Figure S1. Graph displaying freedom from composite endpoint using Kaplan-Meier curves (graph bars indicating the 95% confidence intervals).** The study population was divided into different subgroups according to the peak right ventricular outflow tract (RVOT) gradient (< 25 mmHg and ≥ 25 mmHg) and the severity of pulmonary regurgitation (PR < 25% and PR ≥ 25%). Statistical comparisons between the subgroups were assessed using the Log Rank (Mantel-Cox) test (p-values are displayed in the corresponding table). Patients with moderate PR and a peak RVOT gradient ≥ 25 mmHg demonstrated significantly more adverse events than patients with moderate PR and a peak RVOT gradient < 25 mmHg (p<0.001). In patients with severe PR ≥ 25% RVOT gradients above or below 25 mmHg led to no significant difference (p=0.38).

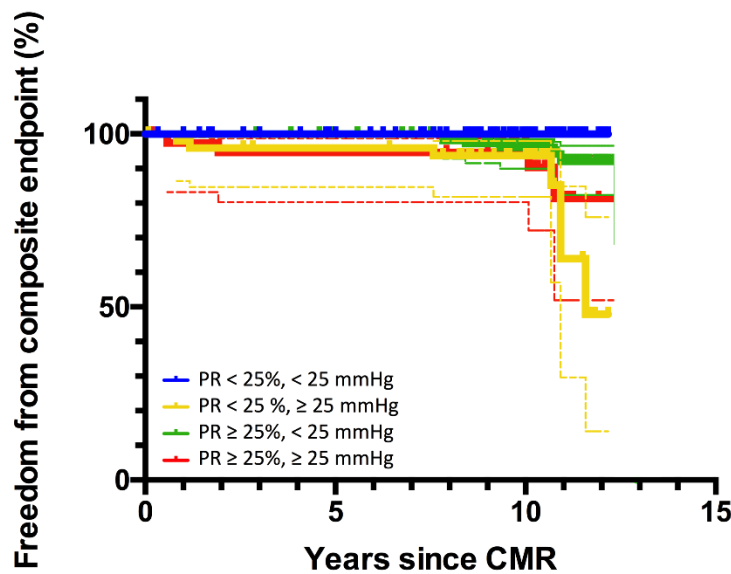

**Numbers at risk**

|  |     |     |    |   |
|--|-----|-----|----|---|
|  | 84  | 71  | 33 | 1 |
|  | 50  | 46  | 32 | 1 |
|  | 122 | 118 | 75 | 7 |
|  | 40  | 33  | 23 | 3 |

| Group             | PR<25%, <25 mmHg | PR <25%, ≥25 mmHg | PR≥25%, <25 mmHg | PR≥25%, ≥25 mmHg |
|-------------------|------------------|-------------------|------------------|------------------|
| PR<25%, <25 mmHg  | -                | <0.001            | 0.08             | 0.006            |
| PR <25%, ≥25 mmHg | <0.001           | -                 | 0.006            | 0.50             |
| PR≥25%, <25 mmHg  | 0.08             | 0.006             | -                | 0.38             |
| PR≥25%, ≥25 mmHg  | 0.006            | 0.50              | 0.38             | -                |

*VT*, ventricular tachycardia; *CMR*, Cardiovascular Magnetic Resonance; *RVOT*, right ventricular outflow tract;

*HR*, hazard ratio; *CI*, confidence interval
